# Supplementary material for: Improving properties of energetic coordination polymers through structural modulation from 1D to 3D without changes of ligands or metal nodes
Source: Royal Society of Chemistry journal article supplement (doi:10.1039/c8ce01912f), 2019-01-01
Supplement: c8ce01912f1.pdf [file c8ce01912f1.pdf]

## Supporting Information

# **Improving properties of energetic coordination polymers through structural modulation from 1D to 3D without changes of ligands or metal nodes**

Xin Li<sup>†</sup>, Qi Sun<sup>†</sup>, Ming Lu\* and Qiuhan Lin\*

*School of Chemical Engineering, Nanjing University of Science and Technology, Nanjing 210094, China*

## **Contents**

- 1 Experimental Section
- 2-4 X-ray crystallographic study
- 3 Single crystal data for compound 1
- 4 Single crystal data for compound 2
- 5 PXRD curves
- 6 Vibration spectroscopy
- 7 Calculation of Detonation Properties
- 8 References

## EXPERIMENTAL SECTION

Caution:

General caution:  $K_2AOT$  and complexes are potentially explosive. Therefore, only small amounts of complexes should be prepared and they should be handled with care. The instrument used for CHN analysis is the Vario EL III elemental analyzer

Materials and General Methods:

Synthesis of  $Pb_2(AOT)_2 \cdot 7(H_2O)$  (1). Firstly, an aqueous solution (3 mL) of  $Pb(NO_3)_2$  (0.50 mmol, 165.5mg) was added to an aqueous solution (5mL) of  $K_2AOT$  (0.50mmol, 137.0mg) at room temperature. Second, the resultant mixture was stirred for 5 min, filtered, and the filter cake was washed with water (5 mL\*3) to obtain an orange solid product. Next, the product was dissolved in 10 mL of  $H_2O$ . The solution was added into a 25 mL beaker. Then the beaker was put into a 100 mL beaker with water inside. Finally, by the diffusion of water vapor after 5 days, crystals suitable for X-ray diffraction (XRD) measurement were obtained. Yield: 70.5mg (35%, based on  $K_2AOT$ ). Elemental analysis (%) calcd for  $Pb_2(AOT)_2 \cdot 7(H_2O)$ : C 5.15, H 1.50, N 30.02; found: C 5.20, H 1.51, N 30.08. IR (KBr,  $cm^{-1}$ ): 3360.20, 2162.42, 1763.07, 1601.60, 1472.76, 1428.39, 1374.08, 1259.47, 1224.33, 1139.38, 1065.87, 823.83, 780.53, 719.36, 592.02.

Synthesis of  $Pb_2(AOT)O \cdot 3(H_2O)$  (2). An aqueous solution (3 mL) of  $Pb(NO_3)_2$  (0.50 mmol, 165.5mg) and an aqueous solution (5mL) of  $K_2AOT$  (0.50mmol, 137.0mg) was mixed at room temperature. Then the resultant mixture was stirred for 5 min, filtered, and the filter cake was washed with water (5 mL\*3) to obtain an orange solid product. The product taken in a screw-capped vial, were added 20 mL of water. Then the mixture was heated to 90 °C for 30 minutes and then filtered quickly. The filtrate was heated at 130°C for 1 day. Subsequently, the reaction mixture was allowed to cool to room temperature slowly for about 20 hours. Red crystals were collected by filtration, washed with water, and dried at room temperature. Elemental analysis (%) calcd for  $Pb_2C_2N_{10}O_3 \cdot 3(H_2O)$ : C 3.53, H 0.88, N 20.59; found: C 3.55, H 0.90, N 20.63. IR (KBr,  $cm^{-1}$ ): 3316.40, 2162.10, 1621.72, 1471.45, 1427.26, 1262.53, 1221.36, 1137.85, 1062.95, 923.03, 779.49, 724.26, 592.49.

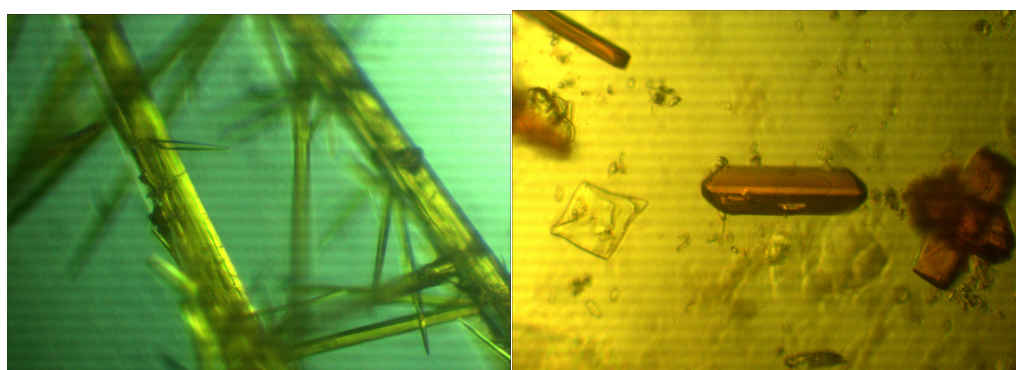

Figure S1. The image of the crystal for compound 1 and 2

### X-ray crystallographic study

Two orange plate crystals 1 and 2 were performed on a Bruker Smart Apex II diffractometer at 173 K. Integration and scaling of intensity data were accomplished using the SAINT program<sup>2</sup>. The structures were solved by intrinsic using SHELXT2014 and refinement was carried out by a fullmatrix least-squares technique using SHELXT2014<sup>3</sup>. The hydrogen atoms were refined isotropically, and the heavy atoms were refined anisotropically. Data were corrected for the effects of absorption using SADABS<sup>4</sup> Relevant crystal data and refinement results are summarized in Table S1.

Table S1 summarizes the structure determination and crystallographic data of compounds 1,2

|                                      | 1                                                                              | 2                                                                            |
|--------------------------------------|--------------------------------------------------------------------------------|------------------------------------------------------------------------------|
| CCDC                                 | 1883503                                                                        | 1845849                                                                      |
| Empirical                            | C <sub>4</sub> H <sub>14</sub> Pb <sub>2</sub> N <sub>20</sub> O <sub>11</sub> | C <sub>2</sub> H <sub>6</sub> Pb <sub>2</sub> N <sub>10</sub> O <sub>6</sub> |
| Formula weight                       | 932.73                                                                         | 680.55                                                                       |
| Crystal system                       | triclinic                                                                      | orthorhombic                                                                 |
| Space group                          | P-1                                                                            | Pccn                                                                         |
| a                                    | 6.5991(6)                                                                      | 11.4741(12)                                                                  |
| b                                    | 10.8137(10)                                                                    | 17.026(2)                                                                    |
| c                                    | 15.2509(12)                                                                    | 5.9443(6)                                                                    |
| $\alpha$                             | 84.753(3)                                                                      | 90                                                                           |
| $\beta$                              | 81.706(3)                                                                      | 90                                                                           |
| $\gamma$                             | 74.843(3)                                                                      | 90                                                                           |
| V                                    | 1037.82(16)                                                                    | 1161.3(2)                                                                    |
| Z                                    | 2                                                                              | 4                                                                            |
| D <sub>c</sub> (g·cm <sup>-3</sup> ) | 2.985                                                                          | 3.893                                                                        |
| T (K)                                | 173                                                                            | 173                                                                          |
| $\mu$ (mm <sup>-1</sup> )            | 16.304                                                                         | 29.008                                                                       |
| F (000)                              | 860.0                                                                          | 1200.0                                                                       |
| GOF on F                             | 1.030                                                                          | 1.059                                                                        |
| R <sub>1</sub> [ $I > 2\sigma(I)$ ]  | 0.0543                                                                         | 0.0382                                                                       |
| wR <sub>2</sub> [ $I > 2\sigma(I)$ ] | 0.0853                                                                         | 0.0813                                                                       |
| R <sub>1</sub> (all data)            | 0.1061                                                                         | 0.0755                                                                       |
| wR <sub>2</sub> (all data)           | 0.0974                                                                         | 0.0923                                                                       |

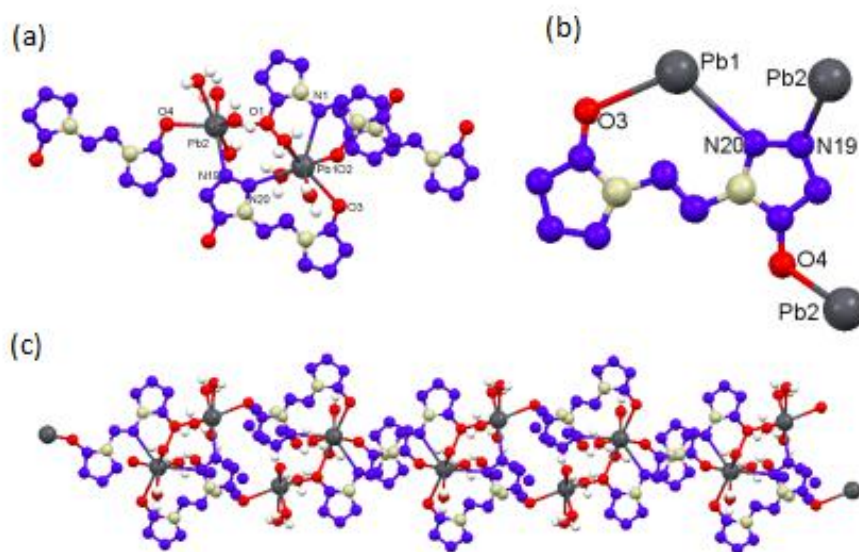

Figure S2. (a) Coordination environments of Pb in 1. (b) Coordination model of AOT in 1. (c) The chain structure of 1

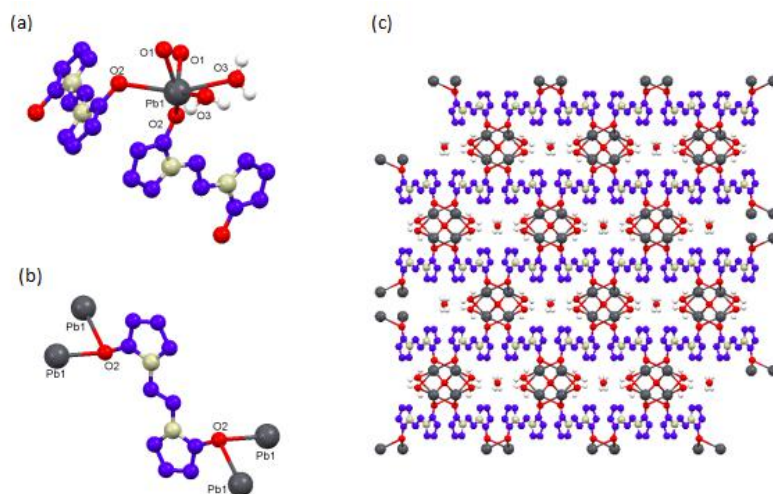

Figure S3. (a) Coordination environments of Pb in 2; (b) coordination model of AOT in 2; (c) 3D porous structure of 2.

Table S2 Bond lengths [ $\text{\AA}$ ] and angles [ $^\circ$ ] for compound 1

|        |         |            |          |
|--------|---------|------------|----------|
| C1-N1  | 1.40(2) | N1-C1-N2   | 117(1)   |
| C1-N2  | 1.34(2) | N1-C1-N5   | 133(1)   |
| C1-N5  | 1.30(2) | N2-C1-N5   | 110(1)   |
| N1-N1  | 1.28(2) | C1-N1-N1   | 111(1)   |
| N2-N3  | 1.34(2) | C1-N2-N3   | 108(1)   |
| N2-O2  | 1.33(1) | C1-N2-O2   | 129(1)   |
| N3-N4  | 1.31(2) | N3-N2-O2   | 122(1)   |
| N4-N5  | 1.35(2) | N2-N3-N4   | 105(1)   |
| O1-Pb1 | 2.318   | N3-N4-N5   | 111(1)   |
| O2-Pb1 | 2.59(1) | C1-N5-N4   | 105(1)   |
| O3-Pb1 | 2.63(1) | Pb1-O1-Pb1 | 100.8    |
| O3-Pb1 | 2.92(1) | Pb1-O1-Pb1 | 117.7    |
|        |         | Pb1-O1-Pb1 | 110.7    |
|        |         | Pb1-O1-Pb1 | 100.1    |
|        |         | N2-O2-Pb1  | 123.7(8) |
|        |         | N2-O2-Pb1  | 113.6(8) |
|        |         | Pb1-O2-Pb1 | 88.9(3)  |
|        |         | H3A-O3-H3B | 121      |
|        |         | H3A-O3-Pb1 | 118.5    |
|        |         | H3A-O3-Pb1 | 60.5     |
|        |         | H3B-O3-Pb1 | 120.7    |
|        |         | H3B-O3-Pb1 | 117.1    |
|        |         | Pb1-O3-Pb1 | 91.5(3)  |
|        |         | O1-Pb1-O2  | 72.6     |
|        |         | O1-Pb1-O3  | 96.3     |
|        |         | O1-Pb1-O1  | 79.5     |
|        |         | O1-Pb1-O2  | 142.4    |
|        |         | O1-Pb1-O3  | 70.2     |
|        |         | O2-Pb1-O3  | 157.2(3) |
|        |         | O2-Pb1-O1  | 82.7     |
|        |         | O2-Pb1-O2  | 85.5(3)  |
|        |         | O2-Pb1-O3  | 122.2(3) |
|        |         | O3-Pb1-O1  | 75.7     |
|        |         | O3-Pb1-O2  | 92.6(3)  |
|        |         | O3-Pb1-O3  | 69.4(3)  |
|        |         | O1-Pb1-O2  | 67.5     |
|        |         | O1-Pb1-O3  | 130.0    |
|        |         | O2-Pb1-O3  | 146.0(3) |

Table S3 Bond lengths [Å] and angles [°] for compound 2

|        |         |             |          |
|--------|---------|-------------|----------|
|        |         |             |          |
| C1-N1  | 1.37(2) | N1-C1-N3    | 119(2)   |
| C1-N3  | 1.31(2) | N1-C1-N6    | 131(2)   |
| C1-N6  | 1.36(2) | N3-C1-N6    | 109(2)   |
| C2-N2  | 1.40(2) | N2-C2-N7    | 120(2)   |
| C2-N7  | 1.32(2) | N2-C2-N10   | 129(2)   |
| C2-N10 | 1.35(2) | N7-C2-N10   | 111(1)   |
| C3-N13 | 1.36(2) | N13-C3-N16  | 109(1)   |
| C3-N16 | 1.33(2) | N13-C3-N11  | 133(1)   |
| C3-N11 | 1.38(2) | N16-C3-N11  | 111(1)   |
| N1-N2  | 1.28(2) | C1-N1-N2    | 116(1)   |
| N1-Pb1 | 2.91(1) | C1-N1-Pb1   | 117(1)   |
| N3-N4  | 1.37(2) | N2-N1-Pb1   | 127(1)   |
| N3-O1  | 1.31(2) | C2-N2-N1    | 112(1)   |
| O1-Pb1 | 2.90(1) | C1-N3-N4    | 108(1)   |
| O1-Pb2 | 2.57(1) | C1-N3-O1    | 131(1)   |
| O2-Pb1 | 2.72(1) | N4-N3-O1    | 121(1)   |
| O3-Pb1 | 2.77(1) | N3-N4-N5    | 106(1)   |
|        |         | N4-N5-N6    | 111(1)   |
|        |         | C1-N6-N5    | 105(1)   |
|        |         | C2-N7-N8    | 107(1)   |
|        |         | N7-N8-N9    | 105(1)   |
|        |         | N8-N9-N10   | 112(1)   |
|        |         | C2-N10-N9   | 104(1)   |
|        |         | C3-N13-N14  | 107(1)   |
|        |         | C3-N13-O3   | 126(1)   |
|        |         | N14-N13-O3  | 126(1)   |
|        |         | N13-N14-N15 | 106(1)   |
|        |         | N14-N15-N16 | 111(1)   |
|        |         | C3-N16-N15  | 107(1)   |
|        |         | N3-O1-Pb1   | 113.9(8) |
|        |         | Pb1-O1-Pb2  | 124.0(4) |
|        |         | N7-O2-Pb1   | 124(1)   |
|        |         | N13-O3-Pb1  | 120.1(9) |
|        |         | H5A-O5-H5B  | 108      |

## PXRD curves

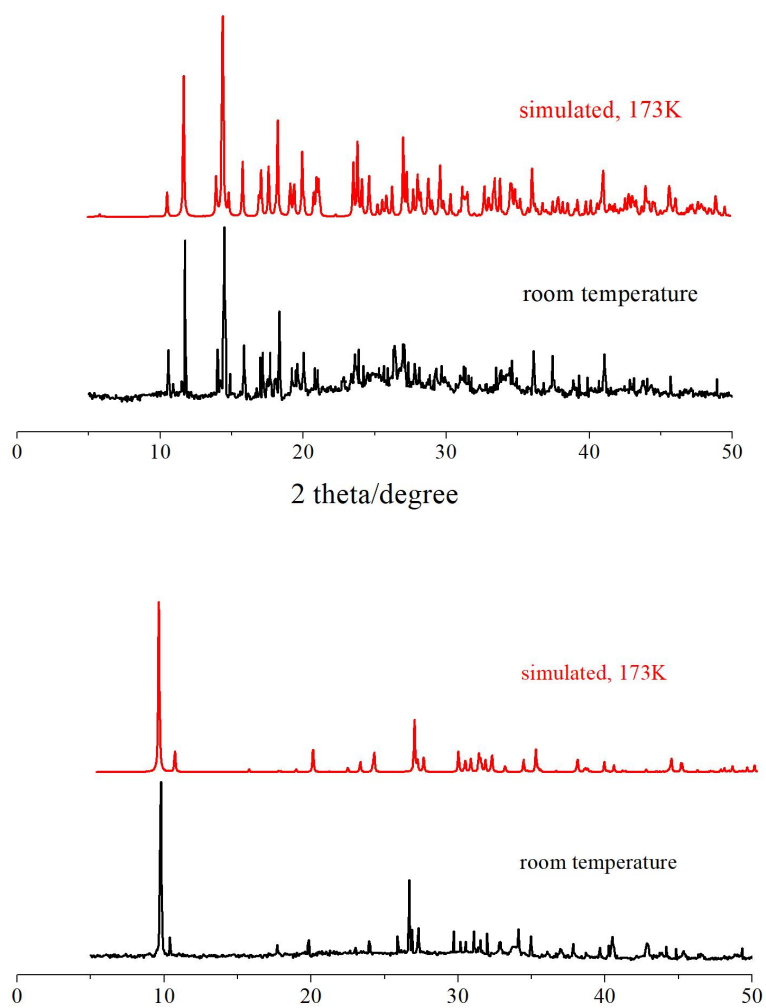

Figure S4. The PXRD curves for compound 1 and 2

## Vibration spectroscopy

Infrared (IR) spectra were recorded on a Bruker FTTR instrument with KBr pellets (4000 - 400 $\text{cm}^{-1}$ )

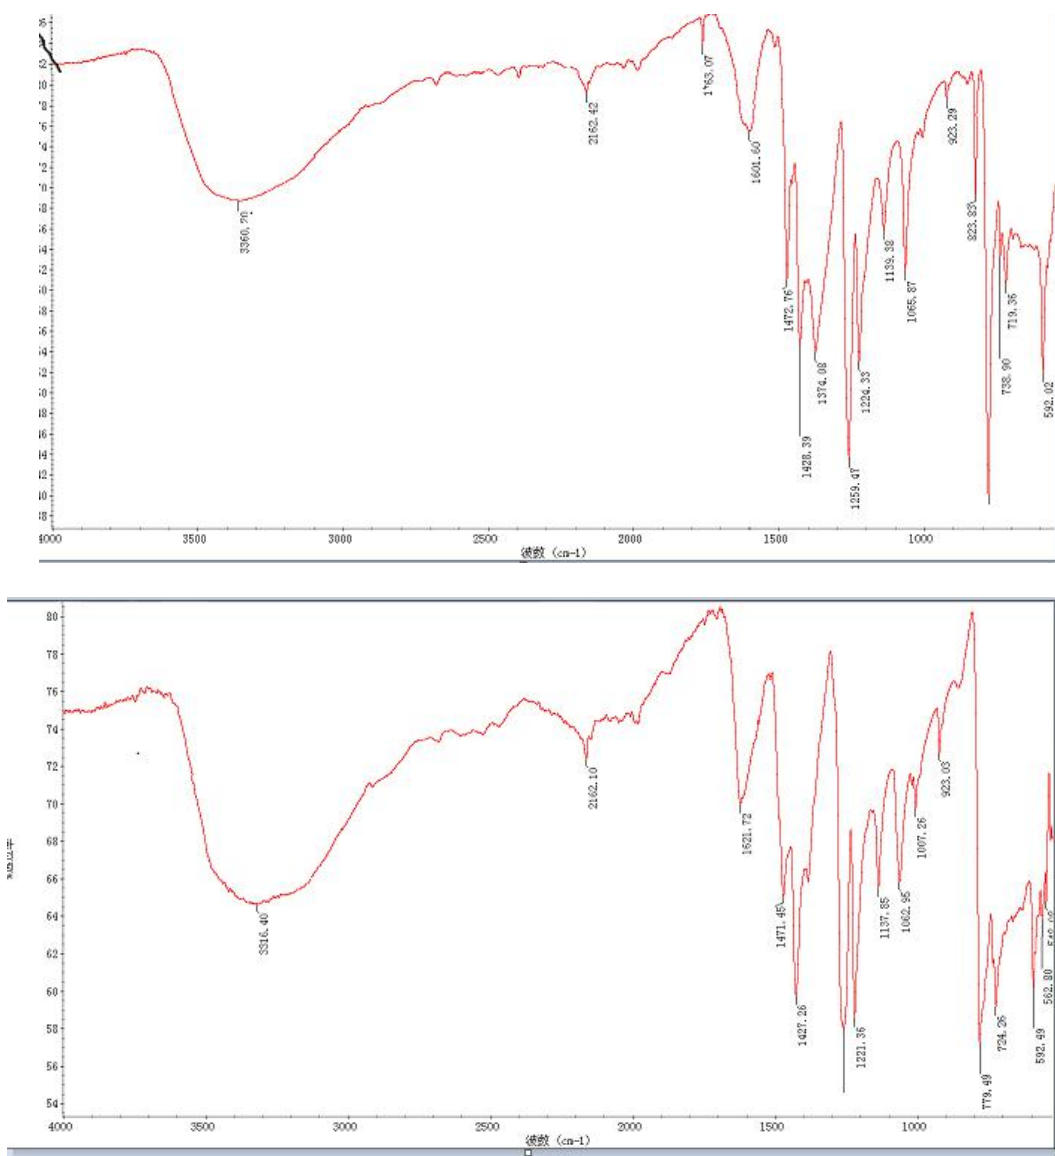

Figure S5 the IR curves of compound 1 and 2



## Calculation of Detonation Properties

Oxygen bomb calorimetry and enthalpy of formation.

The constant-volume combustion energies ( $\Delta_c U$ ) of compounds 1,2 were tested by an oxygen bomb calorimeter (Parr 6400, Parr Instrument Company, Moline Illinois, USA). Approximately 100-200 mg of the samples were pressed for the test. A well-define amount of benzoic acid (NIST Thermo chemical Standard 39j) was added to form a tablet which ensures better combustion. The standardization test is exactly the same as which was used for testing a EMOF sample. The average of five single measurements composed the recorded data.

The  $\Delta_c U$  values from experimental results is  $-2841.6 \text{ J g}^{-1}$  and  $-2233.5 \text{ J g}^{-1}$  respectively. According to the equation,  $\Delta_c H_m^\theta = \Delta_c U_m^\theta + \Delta n RT$ ,  $\Delta n = n_g(\text{products}) - n_g(\text{reactants})$  ( $n_g$  is the total molar amount of gases in the products or reactants,  $R=8.314 \text{ J mol}^{-1} \text{ K}^{-1}$ , and  $T=298.15 \text{ K}$ ). The enthalpies of combustion  $\Delta_c H_m$  can be calculated and the value are  $-1311.6 \text{ KJ mol}^{-1}$  and  $-1506.4 \text{ KJ mol}^{-1}$  respectively.

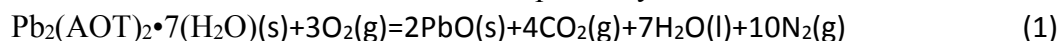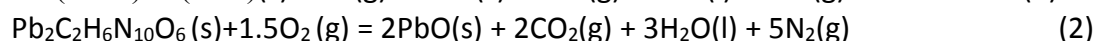

According to the enthalpies of combustion, the ideal combustion reactions and the enthalpies of formation of the combustion products<sup>1</sup> determined experimentally,  $\text{PbO}(\text{s})$ ,  $\Delta_c H_m^\theta(\text{PbO}, \text{s}) = (-219.50 \pm 0.27) \text{ kJ mol}^{-1}$ ,  $\text{CO}_2(\text{g})$ ,  $\Delta_c H_m^\theta(\text{CO}_2, \text{g}) = (-393.51 \pm 0.13) \text{ kJ mol}^{-1}$ ,  $\text{H}_2\text{O}(\text{l})$ ,  $\Delta_c H_m^\theta(\text{H}_2\text{O}, \text{l}) = (-285.830 \pm 0.04) \text{ kJ mol}^{-1}$ , the standard enthalpies of formation  $\Delta_f H$  of 1-2 are calculated to be  $-1669.4 \text{ kJ mol}^{-1}$  and  $-577.1 \text{ kJ mol}^{-1}$  on the basis of Hess's law, respectively.

### Detonation properties

Detonation velocity (D) and detonation pressure (P) are the most important parameters to judge the performance of explosives. Professor Pang and coworkers has introduced a method for for calculating the detonation performance of metal-containing explosives like metal salts and E-CPs with the Kamlet–Jacobs (K–J) method and the Becker-Kistiakowsky-Wilson (BKW) equation.<sup>5</sup> In this work ,this method is used to calculate the detonation velocity and pressure.

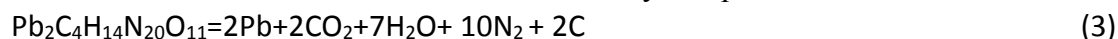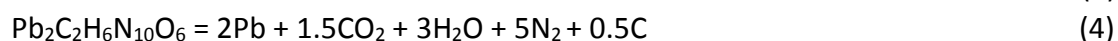

$$D = 1.01\phi^{1/2}(1 + 1.30\rho) \quad (5)$$

$$P = 1.558\phi\rho^2 \quad (6)$$

$$\Phi = 31.68N(\text{MQ})^{1/2} \quad (7)$$

$$Q = \frac{-(\Delta H_f(\text{detonation products}) - \Delta H_f(\text{explosive}))}{M_w} \quad (8)$$

where D is the detonation velocity, P is the detonation pressure, Q is the heat of detonation, N is the number of moles of the gas generated per gram, M is the average molecular weight of the gaseous product, and r is the crystal density.

As shown in Table 2, Q, D, P are calculated. 2 exhibits superior performance: D ( $8153 \text{ m s}^{-1}$ ), P (42Gpa) which is related to the particular structure. In addition, 1 exhibits rather good detonation properties: D ( $7362 \text{ m s}$ ), P (29Gpa).

## REFERENCES

- S1 D. Fischer, T. M. Klapötke, D. G. Piercey, and J. Stierstorfer, *Chem. Eur. J.* 2013, 19, 4602–4613
- S2 SAINT v7.68A Bruker AXS inc.: Madison, WI (2009)
- S3 G. M. Sheldrick, SHELXL-2014/7, University of Gottingen, Germany (2014)
- S4 SADABS v2008/1 Bruker AXS Inc.: Madison, WI (2008)
- S5 M. J. Kamlet and S. T. Jacobs, *J. Chem. Phys.*, 1968, 48, 23-35
